# Supplementary material for: Electrochemical Detection of Dopamine Using 3D Porous Graphene Oxide/Gold Nanoparticle Composites
Source: PubMed Central journal article supplement (PMC5424738; doi:10.3390/s17040861), 2017-04-14
Supplement: sensors-17-00861-s001.pdf [file sensors-17-00861-s001.pdf]

## Supplementary figures and figure captions

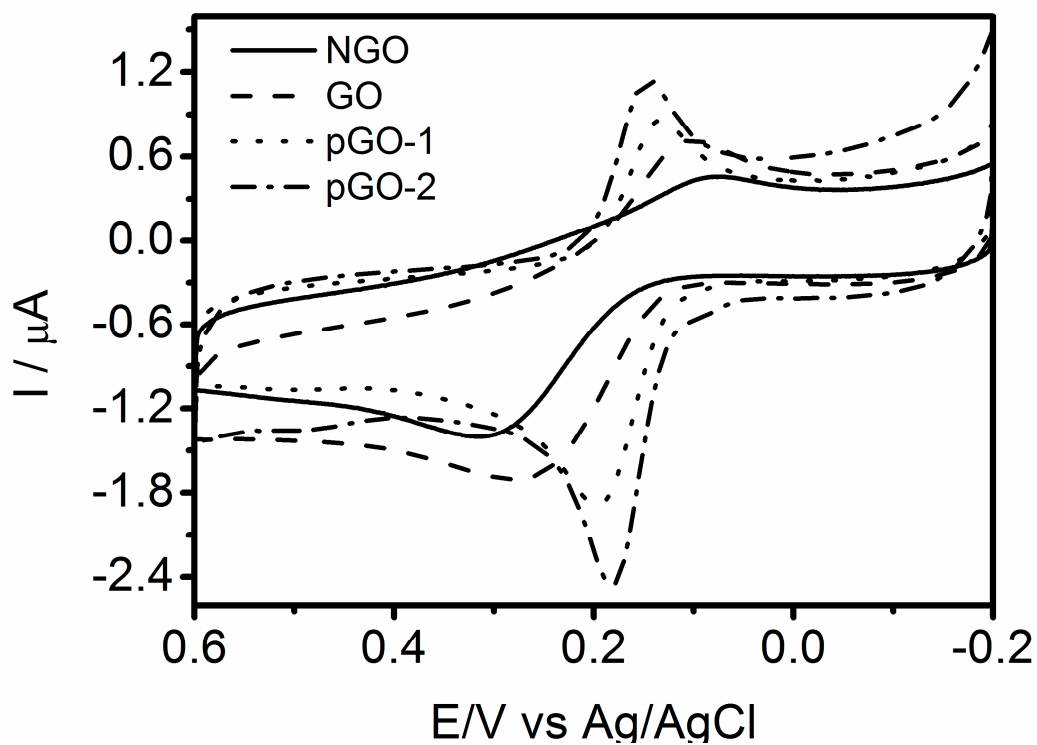

**Figure S1.** Cyclic voltammetric curves obtained from four different substrates in the presence of 10  $\mu\text{M}$  dopamine using DPBS (pH 7.4) as an electrolyte. Scan rate = 0.05 V/s. ‘NGO’, ‘GO’, ‘pGO-1’ and ‘pGO-2’ stand for ‘commercial nano graphene oxide’, ‘graphene oxide’, ‘porous graphene oxide synthesized by 6 hours of ultrasonication and ‘porous graphene oxide synthesized by 12 hours of ultrasonication’.

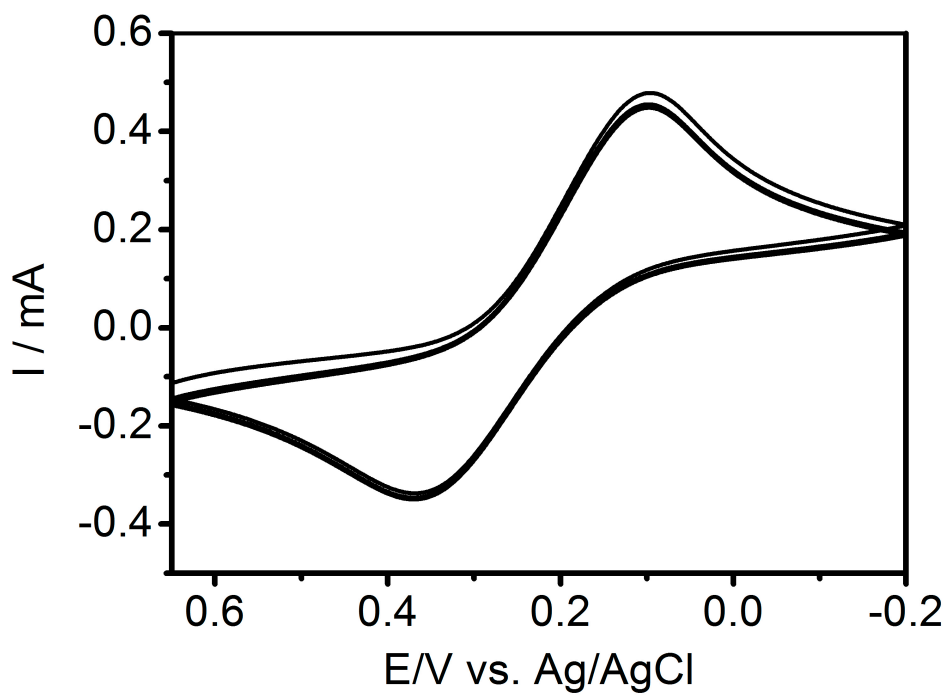

**Figure S2.** Cyclic voltammetric curves obtained from Substrate D using 10mM  $\text{K}_3\text{Fe}(\text{CN})_6$  in 1M  $\text{KNO}_3$  as an electrolyte for the calculation of active surface area of the electrode. Scan rate = 0.05 V/s.
